# Supplementary material for: Characterization of immune responses to anti-PD-1 mono and combination immunotherapy in hematopoietic humanized mice implanted with tumor xenografts
Source: J Immunother Cancer. 2019 Feb 8;7:37. doi: 10.1186/s40425-019-0518-z (PMC6368764; doi:10.1186/s40425-019-0518-z)
Supplement: Supplementary file 3 — Table S2. Flow Cytometric Abs and Reagents. (XLSX 49 kb) [file 40425_2019_518_MOESM3_ESM.xlsx]

## Sheet: Sheet1
Table S2: Flow cytometric Abs and Reagents
Species	Target	Flurochrome	Clone	source	Conc
anti-human	CD3	Fitc	HIT3a	biolegend
anti-human	CD4	Fitc	OKt4	biolegend
anti-human	CD5	Fitc	UCHT2	biolegend
anti-human	CD14	Fitc	63D3	biolegend
anti-human	CD25	Fitc	M-A251	biolegend
anti-human	CD28	Fitc	CD28.2	biolegend
anti-human	CD33	Fitc	HIM3-4	biolegend
anti-human	CD148	Fitc	A3	biolegend
anti-human	Epcam	Fitc	9C4	biolegend
anti-human	CD3	PE	HIT3a	biolegend
anti-human	CD8	PE	Hit8a	biolegend
anti-human	CD11c	PE	s-hcl-3	biolegend
anti-human	CD69	PE	FN50	biolegend
anti-mouse	Kd/Kb	PE	M1/42	biolegend
anti-human	CD3	PERCP	HIT3a	biolegend
anti-human	CD4	PERCP	Okt4	biolegend
anti-human	CD20	PERCP	2H7	biolegend
anti-human	CXCR3	PERCP	G025H7	biolegend
anti-human	HLA-ABC	PERCP	W6/32	biolegend
anti-human	CD3	PeCy7	HIT3a	biolegend
anti-human	CD11b	PeCy7	ICRF44	biolegend
anti-human	CD45	PeCy7	HI30	biolegend
anti-human	IFNg	PeCy7	4S.B3	biolegend
anti-human	CD11c	PacB	s-hcl-3	biolegend
anti-human	CD45	PacB	HI30	biolegend
anti-human	CD25	BV421	BC96	biolegend
anti-human	CD25	BV421	M-A251	biolegend
anti-human	PD-L1	BV421	29E.2A3	biolegend
anti-human	Tim3	BV421	F38-2E2	biolegend
anti-human	CD19	APC	HIB19	biolegend
anti-human	FoxP3	APC	236A/E7	biolegend
anti-human	Granzyme B	AF647	GB11	biolegend
anti-human	PD-1	FITC	NAT105	biolegend
anti-human	PD-1	APC	EH12.2H7	biolegend
anti-human	PD-1	bio	polyclonal	R&D
anti-human	Tbet	APC	G043H7	biolegend
anti-mouse	mCD45	APCCY7	30-F11	biolegend
anti-human	HLA-DR	APCFire	L243	biolegend
anti-human	CD8	APCFire	RPA-T8	biolegend
human	FCR Block			miltenyi
Mouse	CD32		2.4G2
IgM from Human Sera				Sigma	0.92 mg/ml
IgG from Human Sera				Sigma	5 mg/ml
mouse anti-human IgM unlb				Southern
				Biotech
mouse anti-human IgG unlb				Southern
mouse anti-human IgM AP				Biotech
mouse anti-human IgG AP				Southern
Rec Hu IL6				R&D systems	10 ng/ml
Rec Hu SCF				R&D systems	40 ng/ml
Rec Hu FLT3L				R&D systems	20 ng/ml
FCS				Gibco
HBSS				Gibco
IMDM				Gibco
Golgi Stop				BD Bioscience
Cell Stim Cocktail				Invitrogen
Saponin				Sigma
Formaldehyde				Fisher
